# Supplementary material
Source: PubMed Central journal article supplement (PMC5369540)
Supplement: flgastro-2014-100550-s1.pdf [file flgastro-2014-100550-s1.pdf]

## Supplementary Tables

**Supplementary Table 1 - Median doses of the various medications for patients who received sedation and/or analgesia.**

|             | Dose of midazolam (Median, mg) | Dose of diazepam (Median, mg) | Dose of fentanyl (Median, mcg) | Dose of pethidine (Median, mg) |
|-------------|--------------------------------|-------------------------------|--------------------------------|--------------------------------|
| OGD         | 3                              | 16                            | 50                             | N/A                            |
| Colonoscopy | 3                              | 18                            | 50                             | 50                             |
| FS          | 2                              | N/A                           | 62.5                           | N/A                            |
| ERCP        | 3                              | N/A                           | 50                             | 50                             |
| DBE oral    | 6                              | N/A                           | 100                            | N/A                            |
| DBE anal    | 8                              | N/A                           | 100                            | N/A                            |

**Supplementary Table 2 - A comparison of tolerability in relation to HADS anxiety score in all patients (sedated and non-sedated).**

|                       | HADS <11 | HADS 11+ | P-value |
|-----------------------|----------|----------|---------|
| Procedural pain       | 2        | 4        | p=0.008 |
| Procedural discomfort | 4        | 5        | p=0.040 |
| Procedural distress   | 2        | 4        | p=0.003 |
